# Supplementary material for: Mindfulness-based intervention in patients with persistent pain in chest (MIPIC) of non-cardiac cause: a feasibility randomised control study
Source: HighWire-hosted journal article supplement (doi:10.1136/openhrt-2022-001970), 2022-05-01
Supplement: openhrt-2022-001970supp001_data_supplement.pdf [file openhrt-2022-001970supp001_data_supplement.pdf]

## SUPPLEMENTAL FILES

**Study Title** Mindfulness-based intervention in patients with persistent pain in chest (MIPIC) of non-cardiac cause: a feasibility randomised-control study.

### Contents

**Supplemental Figure 1:** Schematic of study design.

RACPC, rapid access chest pain clinic; EPR, electronic patient record; MBCT, mindfulness-based cognitive therapy.

**Supplemental Figure 2:** Sample size calculation.

RACPC, rapid access chest pain clinic

**Supplemental Table 1:** MBCT 8-week programme and its adaptation for chest pain

**Supplemental Table 2:** Medication at recruitment

**Supplemental Table 3:** Treatment effect in control and MBCT groups.

**Supplemental Figure 1. Schematic of study design**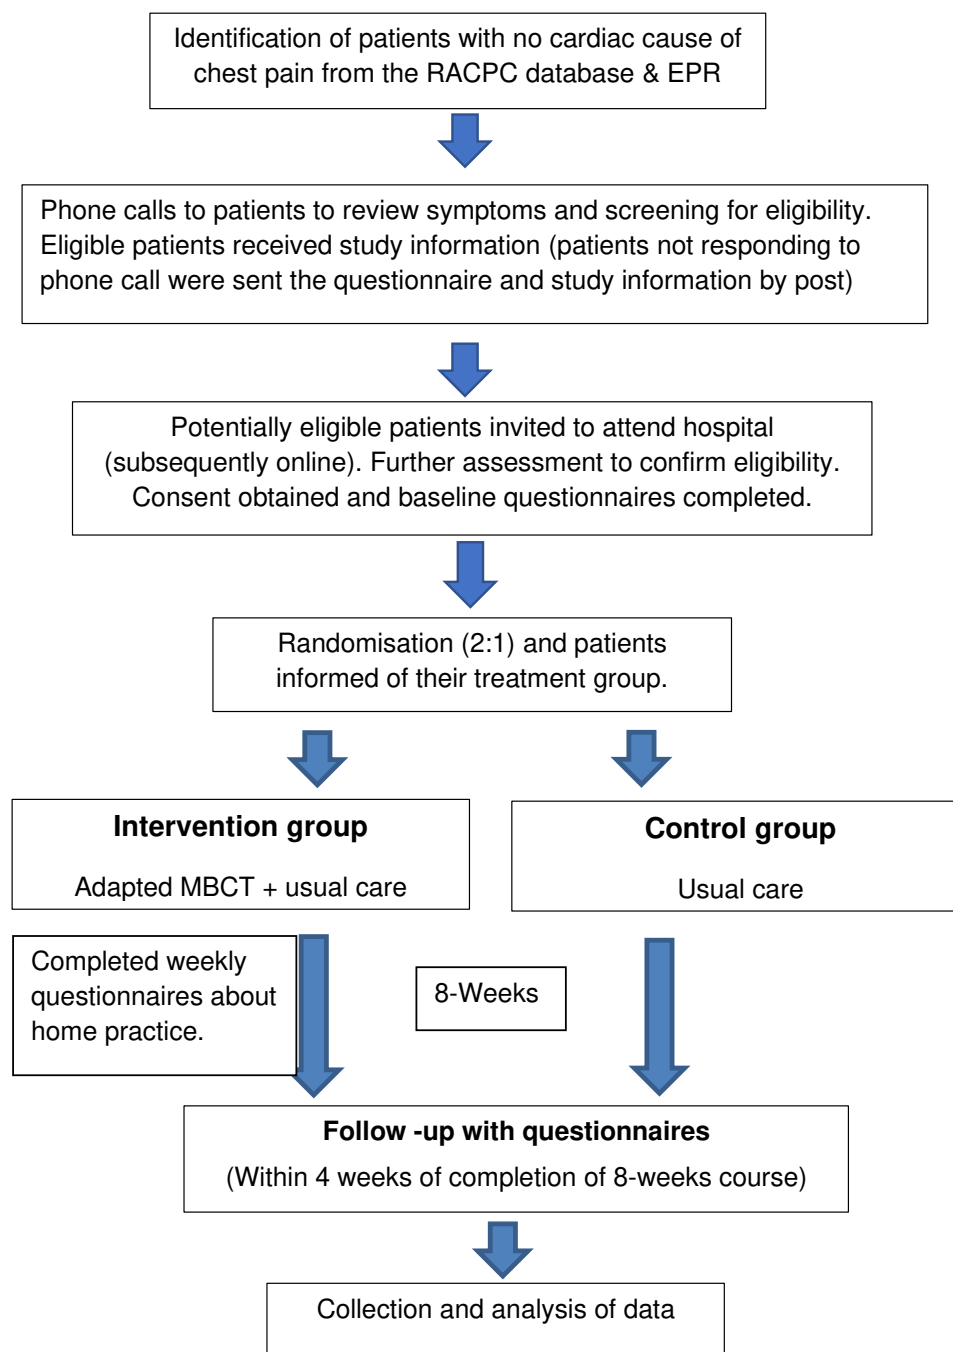

**Supplemental Figure 2: Sample size calculation**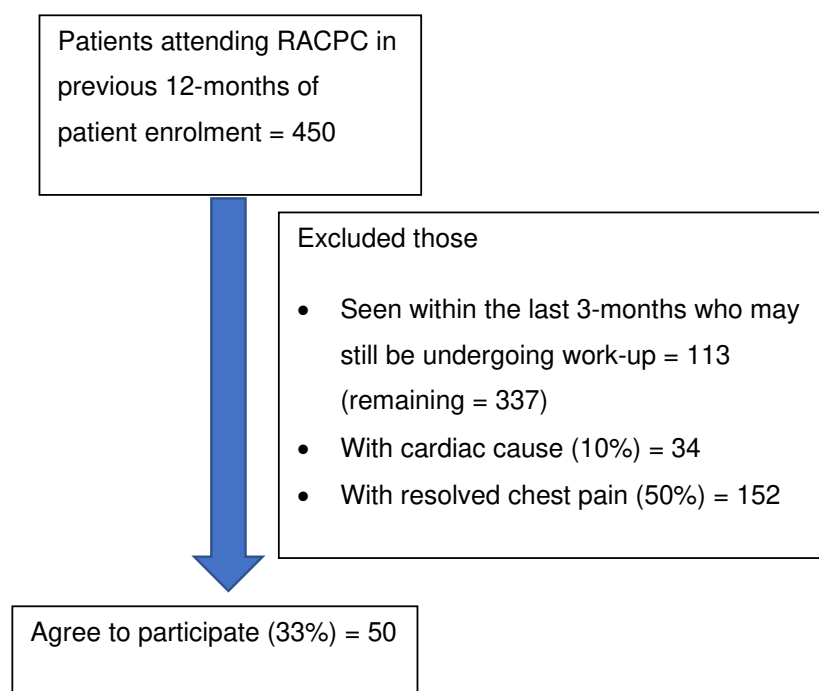

**Supplemental Table 1: MBCT 8-week programme and its adaptation for chest pain**

| Session                               | Original MBCT programme                                                                                                                                                                                                                                                                                                                                                                                                                                                                                                                                                                                     | MBCT programme adaptation for chest pain                                                                                                                                                                                                                                                                                                                                                                                                                                                      |
|---------------------------------------|-------------------------------------------------------------------------------------------------------------------------------------------------------------------------------------------------------------------------------------------------------------------------------------------------------------------------------------------------------------------------------------------------------------------------------------------------------------------------------------------------------------------------------------------------------------------------------------------------------------|-----------------------------------------------------------------------------------------------------------------------------------------------------------------------------------------------------------------------------------------------------------------------------------------------------------------------------------------------------------------------------------------------------------------------------------------------------------------------------------------------|
| <b>Week-1</b>                         |                                                                                                                                                                                                                                                                                                                                                                                                                                                                                                                                                                                                             |                                                                                                                                                                                                                                                                                                                                                                                                                                                                                               |
| Theme                                 | <b>Awareness and Automatic pilot</b>                                                                                                                                                                                                                                                                                                                                                                                                                                                                                                                                                                        | <b>Stepping out of Automatic pilot</b>                                                                                                                                                                                                                                                                                                                                                                                                                                                        |
| Session practices and home-assignment | <ol style="list-style-type: none"> <li>1. Establishing the class orientation</li> <li>2. Setting rules for confidentiality and privacy</li> <li>3. Group introduction</li> <li>4. Raisin exercise<sup>1</sup> followed by practice review</li> <li>5. Body scan practice<sup>1</sup> followed by practice review</li> <li>6. Distributing Session 1 handout</li> <li>7. Home practice assignments <ul style="list-style-type: none"> <li>• Body scan<sup>1</sup> (6 out of 7 days)</li> <li>• Mindfulness of a routine activity</li> <li>• Discussion on challenges of home practice</li> </ul> </li> </ol> | <ol style="list-style-type: none"> <li>1. Class orientation included focus on exploring ways of living with chest pain.</li> <li>2. Same</li> <li>3. Same</li> <li>4. Same</li> <li>5. Exploring pain and physical discomfort – experiential group exercise and psychoeducation</li> <li>6. Body scan practice<sup>1</sup> followed by practice review</li> <li>7. Sharing handout</li> <li>8. Home practice assignments <ul style="list-style-type: none"> <li>• Same</li> </ul> </li> </ol> |
| <b>Week-2</b>                         |                                                                                                                                                                                                                                                                                                                                                                                                                                                                                                                                                                                                             |                                                                                                                                                                                                                                                                                                                                                                                                                                                                                               |
| Theme                                 | <b>Living in our heads</b>                                                                                                                                                                                                                                                                                                                                                                                                                                                                                                                                                                                  | <b>Relationship between thought, emotions, and physical sensations and learning to anchor attention</b>                                                                                                                                                                                                                                                                                                                                                                                       |
| Session practices and home-assignment | <ol style="list-style-type: none"> <li>1. Body scan<sup>1</sup> practice and review</li> <li>2. Home practice review including difficulty in-home practice</li> <li>3. Thoughts and feelings<sup>2</sup> exercise</li> <li>4. Pleasant Experiences Calendar</li> <li>5. Ten-minute sitting meditation<sup>1</sup></li> <li>6. Distributing Session 2 handout</li> <li>7. Home practice assignment</li> </ol>                                                                                                                                                                                                | <ol style="list-style-type: none"> <li>1. Same</li> <li>2. Same</li> <li>3. Same, with an illustration of how our interpretation of physical symptoms relates to our thoughts &amp; feelings</li> <li>4. Same</li> <li>5. Same</li> </ol>                                                                                                                                                                                                                                                     |

|                                       |                                                                                                                                                                                                                                                                                                                                                                                                                                                                                                                                                                                                                                                                                             |                                                                                                                                                                                                                                                                                                                                                                                                                                                                               |
|---------------------------------------|---------------------------------------------------------------------------------------------------------------------------------------------------------------------------------------------------------------------------------------------------------------------------------------------------------------------------------------------------------------------------------------------------------------------------------------------------------------------------------------------------------------------------------------------------------------------------------------------------------------------------------------------------------------------------------------------|-------------------------------------------------------------------------------------------------------------------------------------------------------------------------------------------------------------------------------------------------------------------------------------------------------------------------------------------------------------------------------------------------------------------------------------------------------------------------------|
|                                       | <ul style="list-style-type: none"> <li>• Body scan<sup>1</sup> (6 out of 7 days)</li> <li>• Mindfulness of breath<sup>1</sup>-10 min (6 out of 7 days)</li> <li>• Pleasant Experiences Calendar</li> <li>• Mindfulness of Routing activity<sup>1</sup></li> </ul>                                                                                                                                                                                                                                                                                                                                                                                                                           | 6. Sharing Session 2 handout<br>7. Home practice assignment <ul style="list-style-type: none"> <li>• Same</li> </ul>                                                                                                                                                                                                                                                                                                                                                          |
| <b>Week-3</b>                         |                                                                                                                                                                                                                                                                                                                                                                                                                                                                                                                                                                                                                                                                                             |                                                                                                                                                                                                                                                                                                                                                                                                                                                                               |
| Theme                                 | <b>Gathering the scattered mind</b>                                                                                                                                                                                                                                                                                                                                                                                                                                                                                                                                                                                                                                                         | <b>Gathering the scattered mind and bringing mindfulness to daily life</b>                                                                                                                                                                                                                                                                                                                                                                                                    |
| Session practices and home-assignment | 1. 5-minute “seeing” (or “hearing”) <sup>1</sup><br>2. 30-minute sitting meditation <sup>1</sup> followed by practice review<br>3. Home practice review<br>4. 3-step breathing space <sup>1</sup> and review.<br>5. Mindful stretching <sup>1</sup> and review<br>6. Setting up Unpleasant Experiences Calendar practice<br>7. Distributing Session-3 handout<br>8. Home practice assignment <ul style="list-style-type: none"> <li>• Stretch &amp; breath meditation<sup>1</sup> days 1, 3, and 5</li> <li>• 40-minute mindful movement<sup>1</sup> on days 2, 4. And 6</li> <li>• Unpleasant Experiences Calendar</li> <li>• 3-step breathing space<sup>1</sup>, regular times</li> </ul> | 1. Not included<br>2. Same, with an exploration of any pain in the chest<br>3. Same<br>4. Mindful movement <sup>1</sup> (40 minutes) and review<br>5. Over/ under activity trap <sup>2</sup> (10 minutes) including discussion about any particular movements that trigger chest pain leading to worry or avoidance.<br>6. 3-step breathing space <sup>1</sup> and review.<br>7. Same<br>8. Home practice assignment <ul style="list-style-type: none"> <li>• Same</li> </ul> |
| <b>Week-4</b>                         |                                                                                                                                                                                                                                                                                                                                                                                                                                                                                                                                                                                                                                                                                             |                                                                                                                                                                                                                                                                                                                                                                                                                                                                               |
| Theme                                 | <b>Recognising aversion</b>                                                                                                                                                                                                                                                                                                                                                                                                                                                                                                                                                                                                                                                                 | <b>Reactions to experience – Mapping the territory</b>                                                                                                                                                                                                                                                                                                                                                                                                                        |
| Session practices and home-assignment | 1. 5-minute “seeing” (or “hearing”) <sup>1</sup><br>2. 30-minute sitting meditation <sup>1</sup> followed by practice review<br>3. Home practice review                                                                                                                                                                                                                                                                                                                                                                                                                                                                                                                                     | 1. Not included<br>2. Same<br>3. Same                                                                                                                                                                                                                                                                                                                                                                                                                                         |

|                                       |                                                                                                                                                                                                                                                                                                                                                                                                                                                                                                                                                                                                                                         |                                                                                                                                                                                                                                                                                                                                                                                                                                                                        |
|---------------------------------------|-----------------------------------------------------------------------------------------------------------------------------------------------------------------------------------------------------------------------------------------------------------------------------------------------------------------------------------------------------------------------------------------------------------------------------------------------------------------------------------------------------------------------------------------------------------------------------------------------------------------------------------------|------------------------------------------------------------------------------------------------------------------------------------------------------------------------------------------------------------------------------------------------------------------------------------------------------------------------------------------------------------------------------------------------------------------------------------------------------------------------|
|                                       | <ol style="list-style-type: none"> <li>4. Defining the territory of depression: Automatic Thoughts questionnaire<sup>2</sup></li> <li>5. 3-step breathing space<sup>1</sup> and review</li> <li>6. Mindful walking<sup>1</sup></li> <li>7. Distributing Session-4 handout</li> <li>8. Home practice assignment <ul style="list-style-type: none"> <li>• Sitting meditation<sup>1</sup> (40 minutes), 6 out of 7 days</li> <li>• Breathing space<sup>1</sup>, regular 3 times a day</li> <li>• Breathing space<sup>1</sup>, responsive</li> </ul> </li> </ol>                                                                            | <ol style="list-style-type: none"> <li>4. Getting to know the territory of our minds<sup>2</sup> – exercise to explore pain in the chest and reactions including thoughts and catastrophising.</li> <li>5. Same</li> <li>6. Same</li> <li>7. Sharing Session-4 handout</li> <li>8. Home practice assignment <ul style="list-style-type: none"> <li>• Same</li> </ul> </li> </ol>                                                                                       |
| Week-5                                |                                                                                                                                                                                                                                                                                                                                                                                                                                                                                                                                                                                                                                         |                                                                                                                                                                                                                                                                                                                                                                                                                                                                        |
| Theme                                 | <b>Allowing/Letting Be</b>                                                                                                                                                                                                                                                                                                                                                                                                                                                                                                                                                                                                              | <b>Opening up to difficulty and allowing things to be as they already are</b>                                                                                                                                                                                                                                                                                                                                                                                          |
| Session practices and home-assignment | <ol style="list-style-type: none"> <li>1. 30-minute sitting meditation<sup>1</sup> and practice review</li> <li>2. Home practice review</li> <li>3. Breathing space<sup>1</sup> with added instructions and review</li> <li>4. Read Rumi's poem "The Guest House"</li> <li>5. Distributing Session 5 handouts</li> <li>6. Home practice assignment: <ul style="list-style-type: none"> <li>• Working with difficulty meditation<sup>1</sup>, guided and unguided on alternated days</li> <li>• Breathing space<sup>1</sup>, regular 3 times a day</li> <li>• Breathing space<sup>1</sup> with added instructions</li> </ul> </li> </ol> | <ol style="list-style-type: none"> <li>1. Same</li> <li>2. Same</li> <li>3. Recap: Getting to know the territory of our minds</li> <li>4. Vicious flower exercise<sup>2</sup></li> <li>5. Breath space<sup>1</sup> with added instructions</li> <li>6. Rebalancing the focus: The pleasure of small things<sup>2</sup></li> <li>7. Sharing Session 5 handout</li> <li>8. Home practice assignment <ul style="list-style-type: none"> <li>• Same</li> </ul> </li> </ol> |

| Week-6                                                            |                                                                                                                                                                                                                                                                                                                                                                                                                                                                                                                                                                                                                                                         |                                                                                                                                                                                                                                                                                                                                                                                                                                                                                                                                               |
|-------------------------------------------------------------------|---------------------------------------------------------------------------------------------------------------------------------------------------------------------------------------------------------------------------------------------------------------------------------------------------------------------------------------------------------------------------------------------------------------------------------------------------------------------------------------------------------------------------------------------------------------------------------------------------------------------------------------------------------|-----------------------------------------------------------------------------------------------------------------------------------------------------------------------------------------------------------------------------------------------------------------------------------------------------------------------------------------------------------------------------------------------------------------------------------------------------------------------------------------------------------------------------------------------|
| Theme                                                             | Thoughts are not Facts                                                                                                                                                                                                                                                                                                                                                                                                                                                                                                                                                                                                                                  | Relating to Thoughts Differently                                                                                                                                                                                                                                                                                                                                                                                                                                                                                                              |
| Session practices and home-assignment                             | <ol style="list-style-type: none"> <li>30-minute sitting meditation<sup>1</sup> and practice review</li> <li>Home practice review</li> <li>Moods, thoughts, and alternative viewpoints exercise<sup>2</sup> (office scenarios)</li> <li>Breathing space<sup>1</sup> and review</li> <li>Discuss relapse signature<sup>2</sup></li> <li>Distributing Session 6 handout</li> <li>Home practice assignment <ul style="list-style-type: none"> <li>Practicing with a selection of guided meditations<sup>1</sup> for 40 minutes a day</li> <li>Breathing space<sup>1</sup>, regular</li> <li>Breathing space<sup>1</sup>, responsive</li> </ul> </li> </ol> | <ol style="list-style-type: none"> <li>Same</li> <li>Same</li> <li>Same</li> <li>Same</li> <li>Rebalancing the focus: Opening to pleasant experiences<sup>2</sup></li> <li>Relapse signature: Working wisely with challenging physical symptoms<sup>2</sup></li> <li>Sharing Session 6 handout</li> <li>Home practice assignment <ul style="list-style-type: none"> <li>Same</li> </ul> </li> </ol>                                                                                                                                           |
| Retreat – Whole day practice in silence (Sunday following week-6) |                                                                                                                                                                                                                                                                                                                                                                                                                                                                                                                                                                                                                                                         |                                                                                                                                                                                                                                                                                                                                                                                                                                                                                                                                               |
|                                                                   | <p>Duration: 6 hours 30 minutes</p> <ul style="list-style-type: none"> <li>Sitting meditation<sup>1</sup></li> <li>Mindful stretching<sup>1</sup></li> <li>Body scan<sup>1</sup></li> <li>Lunch in silence</li> <li>Brief sitting<sup>1</sup></li> <li>Walking meditation<sup>1</sup></li> <li>Mountain meditation<sup>1</sup></li> <li>Mindful stretching<sup>1</sup></li> <li>Silent sitting or extended breathing space<sup>1</sup></li> <li>Feeding back experiences in pairs</li> <li>Large-group discussion</li> </ul>                                                                                                                            | <p>Duration: 5 hours 30 minutes</p> <ul style="list-style-type: none"> <li>Sitting meditation<sup>1</sup></li> <li>Stretch and breath<sup>1</sup></li> <li>Body scan<sup>1</sup></li> <li>Lunch in silence</li> <li>Yoga stretches<sup>1</sup></li> <li>Loving-kindness practice<sup>1</sup> or Mountain meditation<sup>1</sup></li> <li>Walking meditation<sup>1</sup></li> <li>Mindful stretching</li> <li>Sitting with body &amp; breath<sup>1</sup></li> <li>Feeding back experiences in pairs</li> <li>Large-group discussion</li> </ul> |

| <b>Week-7</b>                         |                                                                                                                                                                                                                                                                                                                                                                                                                                                                                                                                                                                                                                                                                                                                                                                                          |                                                                                                                                                                                                                                                                                                                                              |
|---------------------------------------|----------------------------------------------------------------------------------------------------------------------------------------------------------------------------------------------------------------------------------------------------------------------------------------------------------------------------------------------------------------------------------------------------------------------------------------------------------------------------------------------------------------------------------------------------------------------------------------------------------------------------------------------------------------------------------------------------------------------------------------------------------------------------------------------------------|----------------------------------------------------------------------------------------------------------------------------------------------------------------------------------------------------------------------------------------------------------------------------------------------------------------------------------------------|
| Theme                                 | <b>How can I best take care of myself?</b>                                                                                                                                                                                                                                                                                                                                                                                                                                                                                                                                                                                                                                                                                                                                                               | <b>How can I best take care of myself?</b>                                                                                                                                                                                                                                                                                                   |
| Session practices and home-assignment | <ol style="list-style-type: none"> <li>1. 30-minute sitting meditation<sup>1</sup> with practice review</li> <li>2. Home practice review</li> <li>3. Exercise to explore links between activity and mood<sup>2</sup></li> <li>4. Plan how best to schedule activities when mood threatens to overwhelm<sup>2</sup></li> <li>5. 3-step breathing space<sup>1</sup></li> <li>6. Identifying actions to deal with threat of relapse/recurrence of depression<sup>2</sup></li> <li>7. 3-step breathing space<sup>1</sup> or mindful walking<sup>1</sup></li> <li>8. Distributing Session 7 handout</li> <li>9. Home practice assignment <ul style="list-style-type: none"> <li>• Same as in Session 6 +</li> <li>• Developing an action plan to be used in the face of lowered moods.</li> </ul> </li> </ol> | <ol style="list-style-type: none"> <li>1. Same</li> <li>2. Same</li> <li>3. Same</li> <li>4. Same</li> <li>5. Same</li> <li>6. Working wisely with challenging physical symptoms<sup>2</sup></li> <li>7. Sharing Session 7 handout</li> <li>8. Home practice assignment <ul style="list-style-type: none"> <li>• Same</li> </ul> </li> </ol> |
| <b>Week-8</b>                         |                                                                                                                                                                                                                                                                                                                                                                                                                                                                                                                                                                                                                                                                                                                                                                                                          |                                                                                                                                                                                                                                                                                                                                              |
| Theme                                 | <b>Maintaining and extending new learning</b>                                                                                                                                                                                                                                                                                                                                                                                                                                                                                                                                                                                                                                                                                                                                                            | <b>Planning for a new way of living</b>                                                                                                                                                                                                                                                                                                      |
| Session practices and home-assignment | <ol style="list-style-type: none"> <li>1. Body scan practice<sup>1</sup> and review</li> <li>2. Home practice review</li> <li>3. Reviewing the whole course</li> <li>4. Discuss how best to keep up momentum developed over last 7-weeks</li> </ol>                                                                                                                                                                                                                                                                                                                                                                                                                                                                                                                                                      | <ol style="list-style-type: none"> <li>1. Same</li> <li>2. Same</li> <li>3. Same</li> <li>4. Same</li> <li>5. Same</li> <li>6. Same</li> </ol>                                                                                                                                                                                               |



|  |                                                                                                                                                             |         |
|--|-------------------------------------------------------------------------------------------------------------------------------------------------------------|---------|
|  | 5. Check and discuss plans, and link to positive reasons to maintain practice<br>6. Distributing Session 8 handout<br>7. Concluding meditation <sup>1</sup> | 7. Same |
|--|-------------------------------------------------------------------------------------------------------------------------------------------------------------|---------|

MBCT, Mindfulness-based cognitive therapy

<sup>1</sup>Mindfulness practices

<sup>2</sup>Cognitive-behaviour Therapy exercises

**Supplemental Table 2: Medication at recruitment**

| Characteristic               | All     | Intervention group (n=22) | Control group (n=11) | p-value |
|------------------------------|---------|---------------------------|----------------------|---------|
| Statins (%)                  | 11 (33) | 10 (45)                   | 1 (9)                | 0.04    |
| Aspirin (%)                  | 4 (12)  | 4 (14)                    | 1 (9)                | 0.71    |
| Nitrates (%)                 | 1 (3)   | 1 (5)                     | 0 (0)                | 0.47    |
| Beta-blockers                | 0       | 0                         | 0                    |         |
| Calcium channel blockers (%) | 4 (12)  | 2 (9)                     | 2 (18)               | 0.45    |
| Metformin (%)                | 5 (15)  | 4 (18)                    | 1 (9)                | 0.49    |
| ACE inhibitors (%)           | 9 (27)  | 7 (32)                    | 2 (18)               | 0.41    |
| Proton pump inhibitors (%)   | 8 (24)  | 6 (27)                    | 2 (18)               | 0.57    |
| Anxiolytics (%)              | 5 (15)  | 4 (18)                    | 1 (9)                | 0.49    |
| Anti-depressants (%)         | 7 (21)  | 5 (23)                    | 2 (18)               | 0.76    |
| NSAIDS (%)                   | 3 (9)   | 3 (14)                    | 0                    | 0.20    |

ACE, angiotensin-converting enzyme inhibitors; NSAID, non-steroidal anti-inflammatory drugs

**Supplemental Table 3: Treatment effect in control and MBCT groups.**

| Variable            | Difference (Post – Pre) |                   | Treatment Effect (95% CI) | p     |
|---------------------|-------------------------|-------------------|---------------------------|-------|
|                     | Control Group (n=6)     | MBCT Group (n=18) |                           |       |
| SAQ                 |                         |                   |                           |       |
| PLS                 | -1.5 (-7, 0)            | 1.5 (-1, 10)      | 5 (-4 to 18)              | 0.20  |
| ASS                 | -25 (-75, 25)           | 0 (-25, 50)       | 50 (-25 to 75)            | 0.14  |
| AFS                 | -10 (-20, 40)           | 10 (0, 40)        | 20 (-20 to 60)            | 0.29  |
| QOL                 | 0 (-12, 25)             | 13 (0, 25)        | 13 (-5 to 37)             | 0.20  |
| HADS                |                         |                   |                           |       |
| Anxiety             | 0.5 (-1, 2)             | -3 (-4, -1)       | -3 (-6, -1)               | 0.019 |
| Depression          | 0 (-1, 1)               | -3 (-5, 0)        | -3 (-5 to 0)              | 0.07  |
| CAQ                 | -0.1 (-0.2, 0.1)        | -0.15 (-0.5, 0.2) | -0.1 (-0.5 to 0.4)        | 0.71  |
| FFMQ_               |                         |                   |                           |       |
| Describing          | -0.83                   | 2.06              | 2.89                      | 0.028 |
| Awareness           | -0.17                   | 1.11              | 1.28                      | 0.30  |
| Non-judging         | -1.33                   | 1.33              | 2.66                      | 0.032 |
| Non-reactivity      | -0.17                   | 1.72              | 1.89                      | 0.25  |
| Total score         | -2.50                   | 6.22              | 8.72                      | 0.002 |
| EQOL                |                         |                   |                           |       |
| Mobility            | 0 (0, 0)                | 0 (0, 0)          | 0 (0 to 1)                | 0.62  |
| Self-care           | 0 (0, 0)                | 0 (-1, 0)         | 0 (-1 to 0)               | 0.53  |
| Usual activities    | 0 (0, 0)                | 0 (-1, 0)         | 0 (-1 to 0)               | 0.77  |
| Pain discomfort     | 0 (-1, 0)               | 0 (-1, 0)         | 0 (-1 to 1)               | 0.71  |
| Anxiety/depression  | 0 (-1, 0)               | 0 (-1, 0)         | 0 (-1 to 0)               | 0.77  |
| Health today        | -6 (-10, -5)            | 8 (-19, 10)       | 13.5 (-13 to 29)          | 0.19  |
| ASUS                |                         |                   |                           |       |
| Hospital Inpatient  | 0 (0, 0)                | 0 (0, 0)          | 0 (0, 0)                  | 1.00  |
| Hospital Outpatient | 0 (-1, 0)               | 0 (0, 0)          | 0 (0 to 1)                | 0.11  |
| A&E                 | 0 (0, 0)                | 0 (0, 0)          | 0 (0, 0)                  | 1.00  |
| GP                  | 0 (-1, 0)               | 0 (0, 1)          | 1 (-1 to 2)               | 0.34  |

SAQ, Seattle Angina Questionnaire; PLS, Physical limitation score; ASS, Angina stability score; AFS, Angina frequency score; HADS, Hospital Anxiety and Depression Scale; CAQ, Cardiac anxiety questionnaire; FFMQ, Five facet mindfulness questionnaire; EQOL, European Quality of Life questionnaire; AD-SUS, Adult service use schedule
